# Supplementary material
Source: Springer Nature journal article supplement (https://www.springermedizin.de/resource/supplementary/12891_2008_595_MOESM2_ESM.pdf/9506314)

Normal Posture

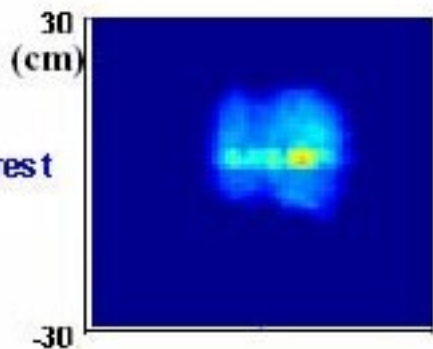

Off-Loading Posture

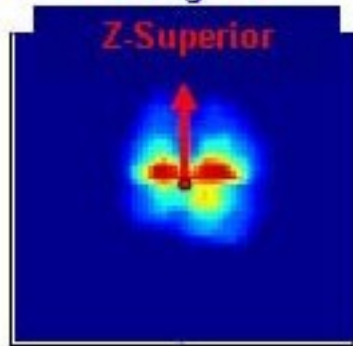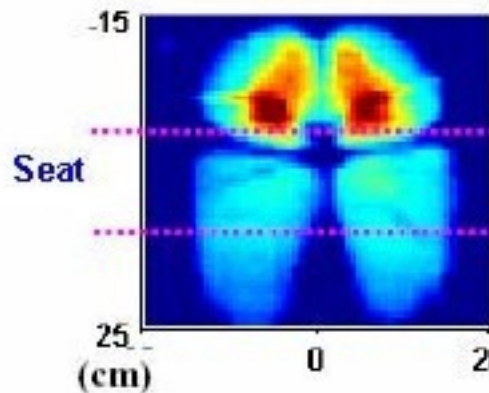

Posterior Cushion

Middle Cushion

Anterior Cushion

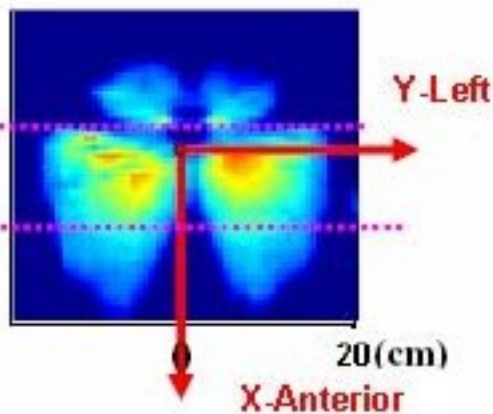

Supplement: MOESM2 [file 9506314]
